# Supplementary material for: Influence of Plant Fraction, Soil, and Plant Species on Microbiota: a Multikingdom Comparison
Source: PubMed Central journal article supplement (PMC7002342; doi:10.1128/mbio.02785-19), 2020-02-04

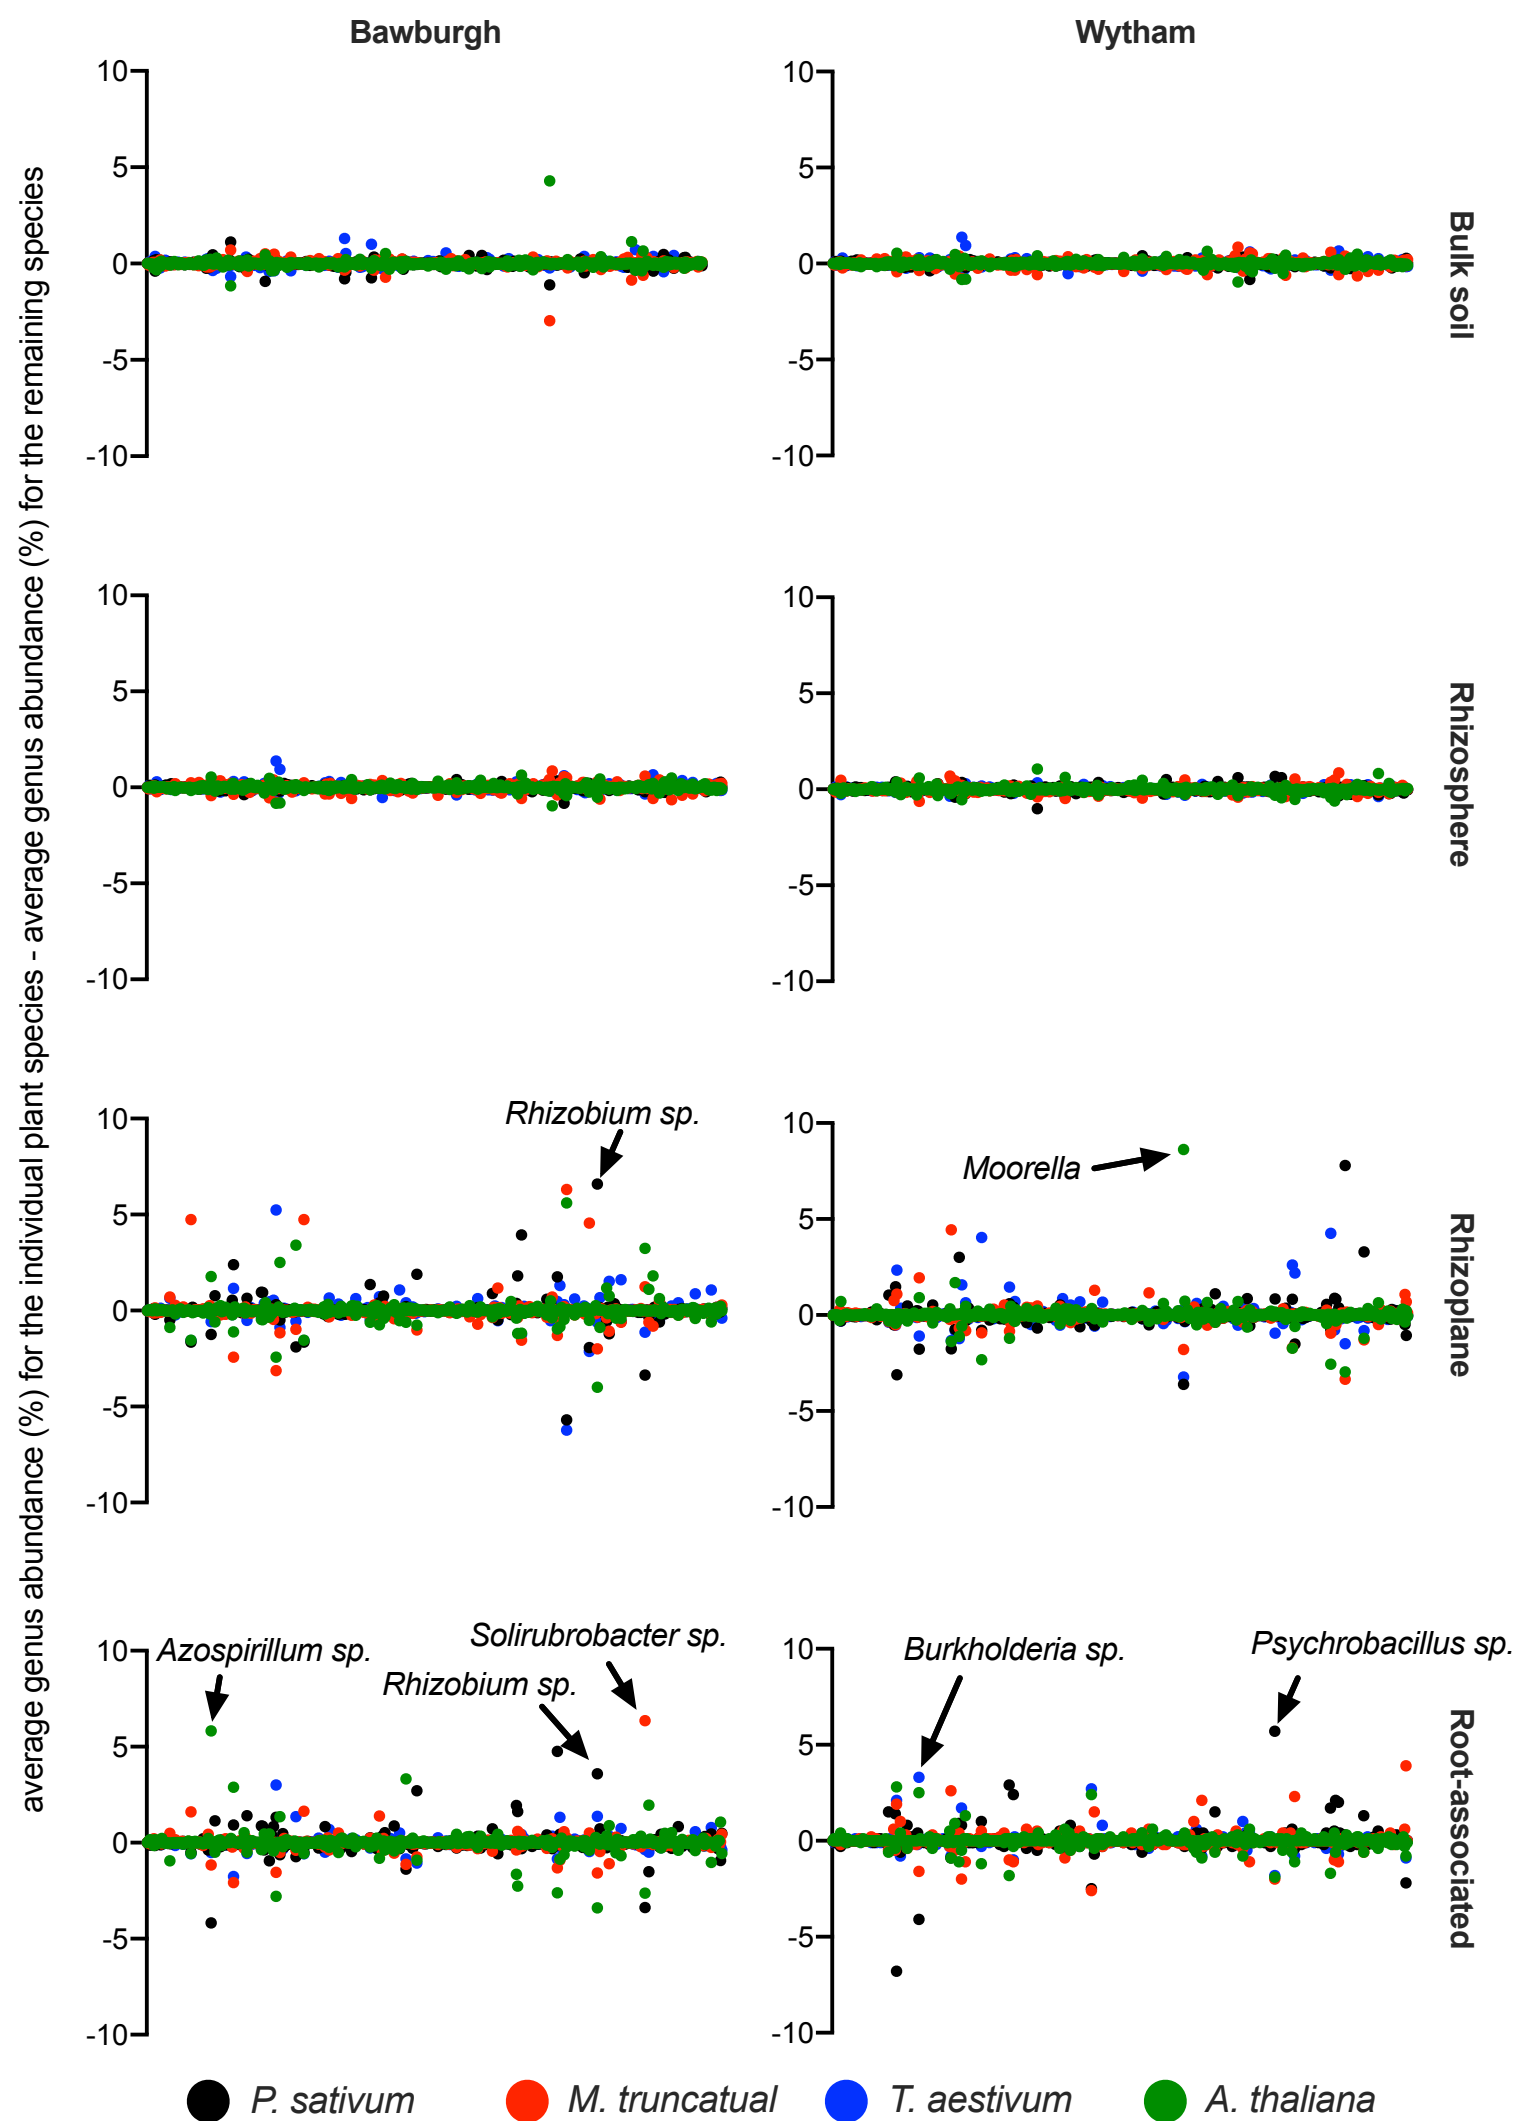

Supplement: mBio.02785-19-sf004.pdf [file mBio.02785-19-sf004.pdf]
